# Supplementary figures and images for: Thermal transport across copper–water interfaces according to deep potential molecular dynamics
Source: Royal Society of Chemistry journal article supplement (doi:10.1039/d2cp05530a), 2023-01-01

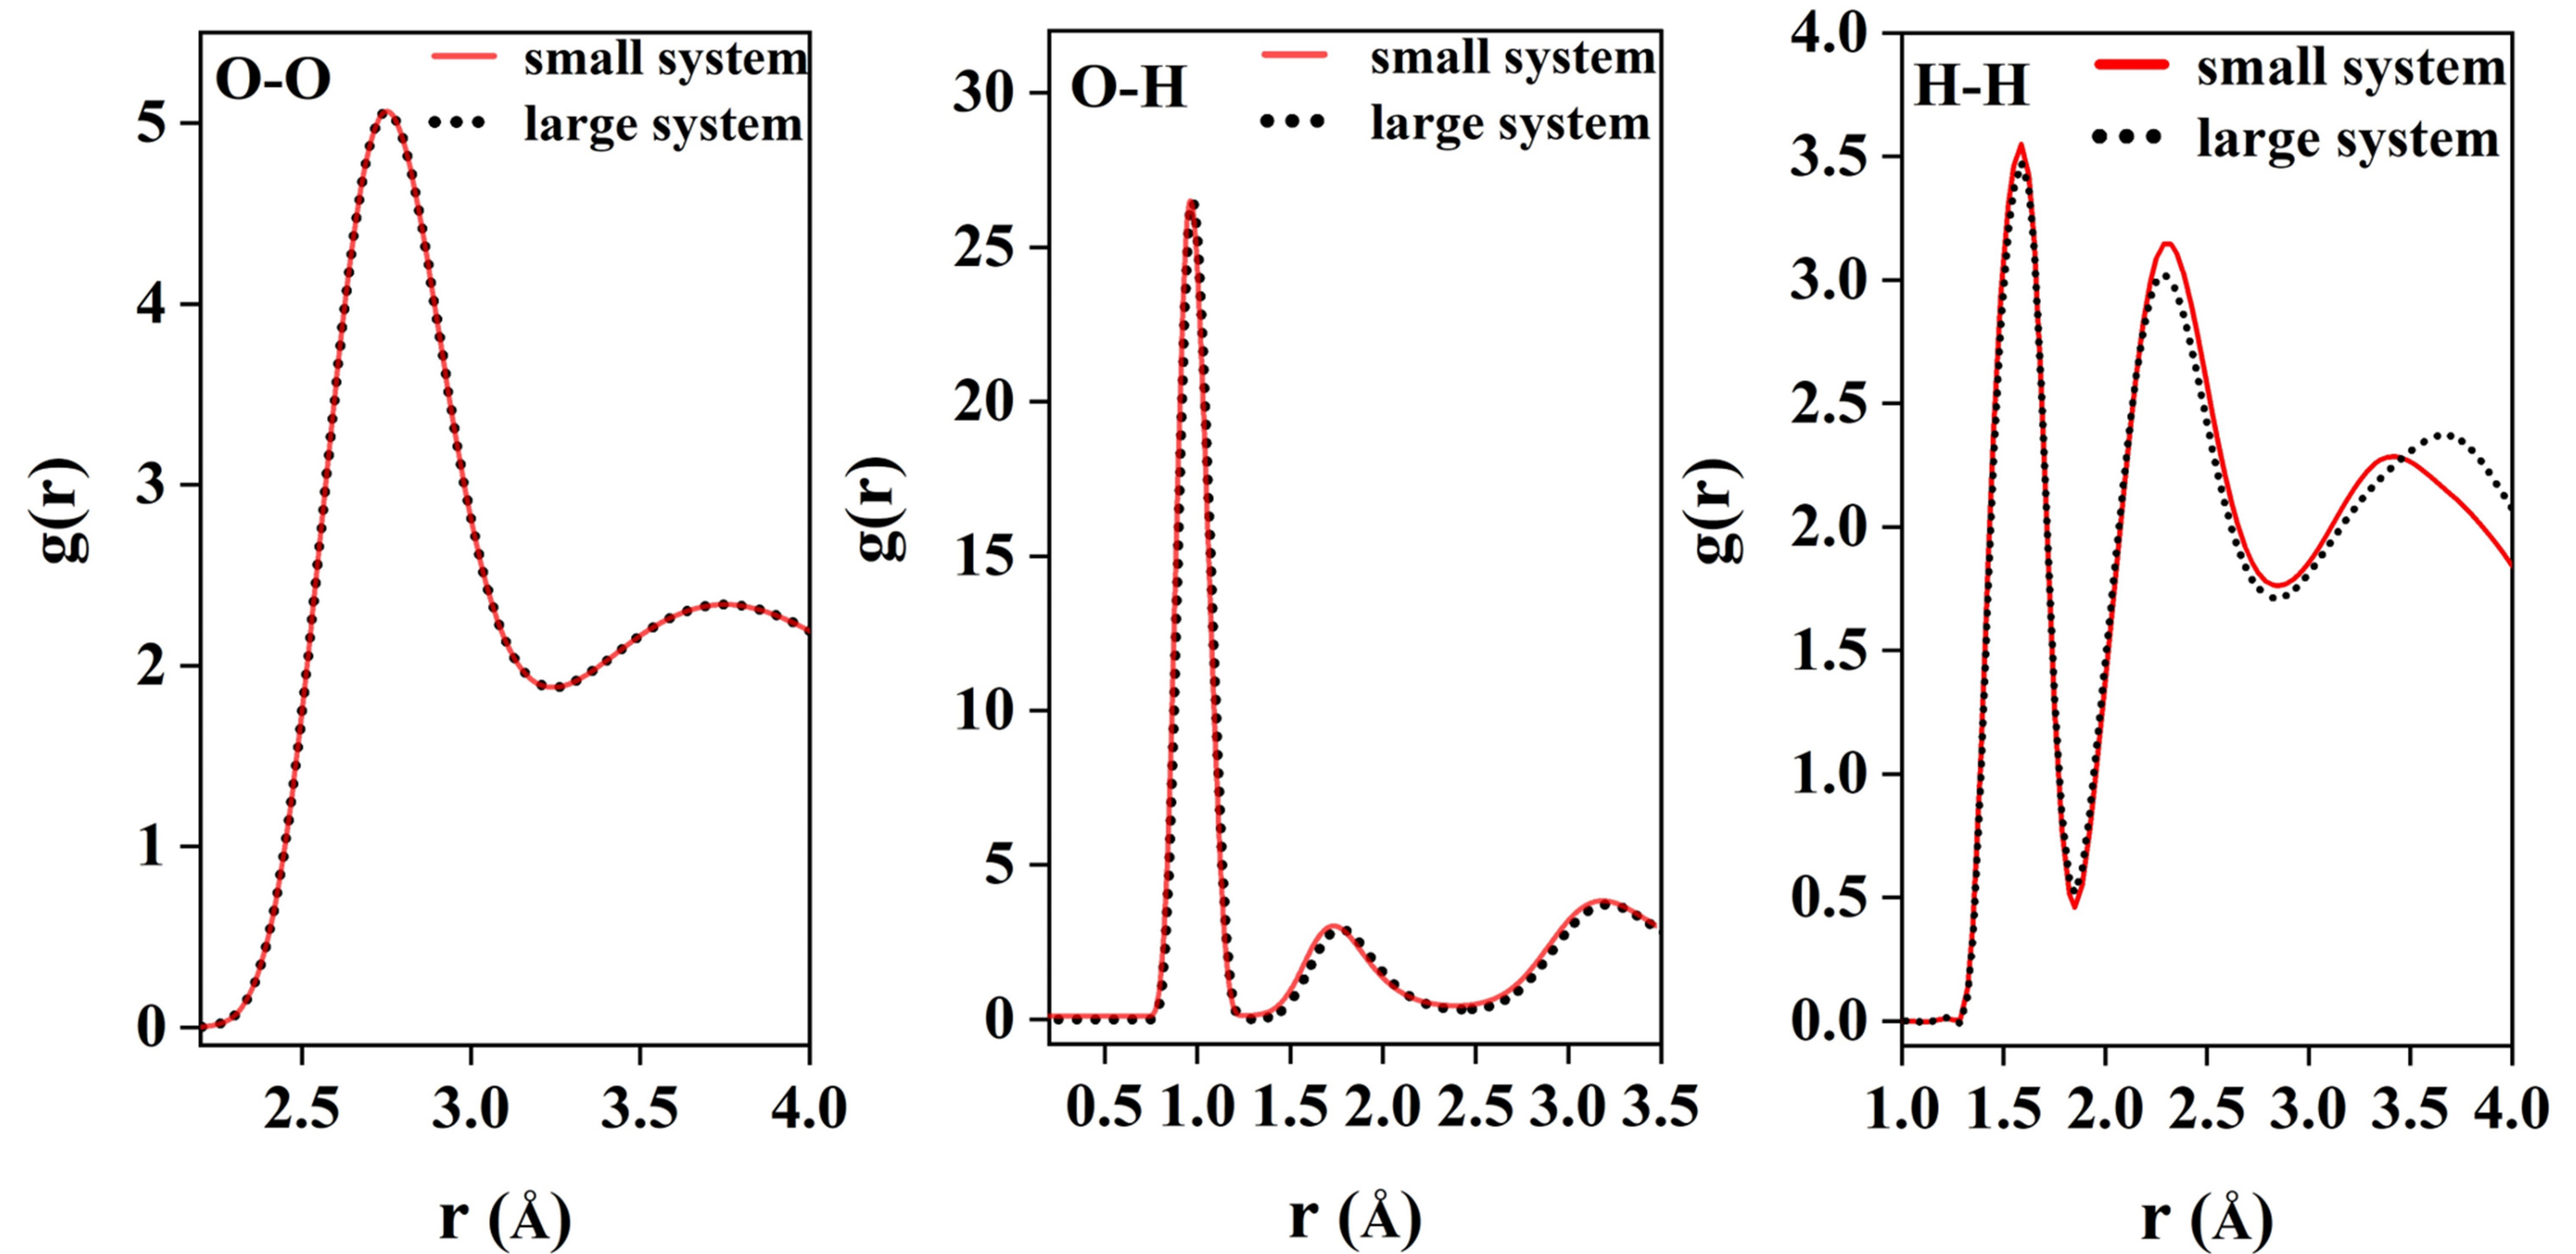

Supplement: d2cp05530a2.pdf [file d2cp05530a2.pdf]
